# Supplementary material for: Divergent polo box domains underpin the unique kinetoplastid kinetochore
Source: PubMed Central journal article supplement (PMC4821238; doi:10.1098/rsob.150206), 2016-03-16
Supplement: rsob150206supp2.pdf [file rsob150206supp2.pdf]

**Table S2.** Accession numbers for protein sequences retrieved from TriTryp database [1–3], GeneDB [4,5], NCBI database [6] or GenBank [7]

| <b>Gene</b> | <b>Organism</b>                       | <b>Accession number</b> |
|-------------|---------------------------------------|-------------------------|
| KKT20       | <i>Trypanosoma brucei</i>             | Tb927.8.4760            |
|             | <i>Trypanosoma congolense</i>         | TcIL3000_0_00100        |
|             | <i>Trypanosoma vivax</i>              | TvY486_0804180          |
|             | <i>Trypanosoma cruzi</i>              | TcCLB.419043.10         |
|             | <i>Angomonas deanei</i>               | EPY28808                |
|             | <i>Crithidia fasciculata</i>          | CFAC1_040021300         |
|             | <i>Leishmania mexicana</i>            | LmxM.10.1227            |
|             | <i>Strigomonas culicis</i>            | EPY28494                |
|             | <i>Bodo saltans</i>                   | BS19285                 |
| KKT3        | <i>Trypanosoma rangeli</i>            | ESL05960                |
|             | <i>Trypanosoma grayi</i>              | XP_009309824            |
|             | <i>Crithidia fasciculata</i>          | CFAC1_300091200         |
| KKT2        | <i>Crithidia fasciculata</i>          | CFAC1_280060200         |
| PLK         | <i>Candida tenuis</i>                 | XP_006685766            |
|             | <i>Trichoplax adhaerens</i>           | XP_002116022            |
|             | <i>Trypanosoma brucei</i>             | Tb927.7.6310            |
|             | <i>Trypanosoma cruzi</i>              | TcCLB.506513.160        |
|             | <i>Bodo saltans</i>                   | BS35140                 |
|             | <i>Naegleria gruberi</i>              | XP_002670439            |
|             | <i>Drosophila melanogaster</i> (Polo) | NP_524179               |
|             | <i>Homo sapiens</i> (Plk1)            | NP_005021               |

KKT3 and KKT2 from other species were described previously [8].

**Table S3.** Trypanosome cell lines used in this study.

| Strain | Description                                            | Used in Figure |
|--------|--------------------------------------------------------|----------------|
| SmOxP9 | Parental cell line that expresses TetR and T7 RNAP [9] | –              |
| BAP391 | TY-YFP-KKT20                                           | 1              |
| BAP517 | GFP-NLS-KKT2 DPB                                       | 4a, 4b         |
| BAP296 | GFP-NLS-KKT3 DPB                                       | data not shown |
| BAP535 | GFP-NLS-KKT2 DPB W1048A                                | 4b             |
| BAP538 | GFP-NLS-KKT2 DPB Y1064A                                | 4b             |
| BAP327 | GFP-NLS-KKT2                                           | 4c             |
| BAP533 | GFP-NLS-KKT2 W1048A                                    | 4c             |
| BAP536 | GFP-NLS-KKT2 Y1064A                                    | 4c             |
| BAP308 | TY-tdTomato-KKT2                                       | –              |
| BAP546 | TY-tdTomato-KKT2, GFP-NLS-KKT20 DPB                    | 4d             |
| BAP550 | TY-tdTomato-KKT2, GFP-NLS-KKT20 DPB W99A               | 4d             |
| BAP551 | TY-tdTomato-KKT2, GFP-NLS-KKT20 DPB Y112A              | 4d             |
| BAP545 | TY-tdTomato-KKT2, GFP-NLS-KKT20                        | 4e             |
| BAP547 | TY-tdTomato-KKT2, GFP-NLS-KKT20 W99A                   | 4e             |
| BAP549 | TY-tdTomato-KKT2, GFP-NLS-KKT20 Y112A                  | 4e             |

**Table S4.** Plasmids used in this study.

| Plasmid | Description                                                                      |
|---------|----------------------------------------------------------------------------------|
| pEnT5-Y | TY-YFP tagging vector, Hygromycin [9]                                            |
| pBA67   | TY-YFP-KKT2 tagging vector, Hygromycin [8]                                       |
| pBA148  | TY-tdTomato tagging vector, Blasticidin [8]                                      |
| pBA164  | TY-tdTomato-KKT2 tagging vector, Blasticidin                                     |
| pBA463  | TY-YFP-KKT20 tagging at endogenous locus, Hygromycin                             |
| pDEX777 | Inducible expression vector (GFP-TY fusion), integrate at 177 bp, Phleomycin [9] |
| pBA310  | Inducible expression vector (GFP-NLS fusion), integrate at 177 bp, Phleomycin    |
| pBA736  | Inducible GFP-NLS-KKT2 DPB, integrate at 177 bp, Phleomycin                      |
| pBA366  | Inducible GFP-NLS-KKT3 DPB, integrate at 177 bp, Phleomycin                      |
| pBA782  | Inducible GFP-NLS-KKT2 DPB W1048A, integrate at 177 bp, Phleomycin               |
| pBA785  | Inducible GFP-NLS-KKT2 DPB Y1064A, integrate at 177 bp, Phleomycin               |
| pBA425  | Inducible GFP-NLS-KKT2, integrate at 177 bp, Phleomycin                          |
| pBA780  | Inducible GFP-NLS-KKT2 W1048A, integrate at 177 bp, Phleomycin                   |
| pBA783  | Inducible GFP-NLS-KKT2 Y1064A, integrate at 177 bp, Phleomycin                   |
| pBA748  | Inducible GFP-NLS-KKT20 DPB, integrate at 177 bp, Phleomycin                     |
| pBA791  | Inducible GFP-NLS-KKT20 DPB W99A, integrate at 177 bp, Phleomycin                |
| pBA792  | Inducible GFP-NLS-KKT20 DPB Y112A, integrate at 177 bp, Phleomycin               |
| pBA747  | Inducible GFP-NLS-KKT20, integrate at 177 bp, Phleomycin                         |
| pBA786  | Inducible GFP-NLS-KKT20 W99A, integrate at 177 bp, Phleomycin                    |
| pBA790  | Inducible GFP-NLS-KKT20 Y112A, integrate at 177 bp, Phleomycin                   |

**Table S5.** Primers used in this study.

| To make        | Primers (all are listed 5' to 3')                                                                                                                                                                                                                                                                               |
|----------------|-----------------------------------------------------------------------------------------------------------------------------------------------------------------------------------------------------------------------------------------------------------------------------------------------------------------|
| pBA463         | CDS targeting sequence with XbaI and NotI<br>BA887: GATCGATC TCTAGA GGAGCAGGT AGGTGCGTATTATTTACT<br>BA888: GATCGATC GCGGCCGC GAGTAAGCCCCATTTACCG<br>5'UTR targeting sequence with NotI and BamHI<br>BA889: GATCGATC GCGGCCGC CTGTTTACCGCGCGTCTGAC<br>BA890: GATCGATC GGATCC TCAGTGGTTAGTGGTGGCAG                |
| pBA310         | NLS with multiple cloning sites with synthetic XbaI and BamHI sites<br>BA680: CTAGA ATCGATAC CGGT CGAGGACACAAGCGGTCACGTGAA<br>CAATTGCCGCGGGATATCCATATGTTAATTAAGGCGCGCCTGATCAGTTT<br>AAAC G<br>BA681: GATCC<br>GTTTAAACTGATCAGGCGCGCCTTAATTAACATATGGATATCCCGCGGC<br>A ATTGTTACAGTGACCGCTTGTGTCCTCGACCGGTATCGAT T |
| pBA425         | CDS targeting sequence with BamHI and AflII<br>BA763: AGTCAC GGATCC TTCAATGTCTCACCAGCGAG<br>BA768: AGCCAC CTTAAG TCATTTCCGGTAGACGTTGC                                                                                                                                                                           |
| pBA736         | CDS targeting sequence with BamHI and AflII<br>BA1159: AGTCAC GGATCC ACGGCGTACCTGGCCCTTCC<br>BA768: AGCCAC CTTAAG TCATTTCCGGTAGACGTTGC                                                                                                                                                                          |
| pBA366         | CDS targeting sequence with BamHI and AflII<br>BA619: AGTCAC GGATCC CTAAGTGGTGAATGGAAACC<br>BA620: AGCCAC CTTAAG TTACACGCCACCGTAGAGCAT                                                                                                                                                                          |
| pBA747         | CDS targeting sequence with PacI and AscI<br>BA985: GATC TTAATTAA G AGGTGCGTATTATTTACT<br>BA988: GATC GGCGCGCC CTACCTTTGTCCTCCTTTTAAAT                                                                                                                                                                          |
| pBA748         | CDS targeting sequence with PacI and AscI<br>BA1157: AGTCAC TTAATTAA G ACTCCTTTCACTGCACTGGT<br>BA988: GATC GGCGCGCC CTACCTTTGTCCTCCTTTTAAAT                                                                                                                                                                     |
| KKT2<br>W1048A | BA1292:<br>GATGACTTCCTAAGCGGGGCG <u>GCG</u> GTAAGGGTTTACTCTTTCATTG<br>BA1293:<br>CAATGAAAGAGTAAACCCTTACCGCCGCCCGCTTAGGAAGTCATC                                                                                                                                                                                  |
| KKT2<br>Y1064A | BA1294:<br>CTGAAGTTGTTGTGATGTAT <u>GCT</u> TCTGTGCAACCCGGTAGGTAC<br>BA1295:<br>GTACCTACCGGGTTGCACAGAAGCATAACATCACAACAACCTTCAG                                                                                                                                                                                   |
| KKT20<br>W99A  | BA1296:<br>GTAATGAGGCCTACTGTCTAC <u>GCG</u> AGTGAGAGTGAGAGCTCTAG                                                                                                                                                                                                                                                |

BA1297:  
CTAGAGCTCTCACTCTCACTCGCGTAGACAGTAGGCCTCATTAC  
KKT20 BA1298:  
Y112A CTAGAGCAATTGCACTTTGC GCC CAGATCCATCGAGACATTC  
BA1299:  
GAATGTCTCGATGGATCTGGGCGCAAAGTGCAATTGCTCTAG

---

### Supplementary Reference

1. Berriman, M. et al. 2005 The genome of the African trypanosome *Trypanosoma brucei*. *Science* **309**, 416–422. (doi:10.1126/science.1112642)
2. El-Sayed, N. M. et al. 2005 The genome sequence of *Trypanosoma cruzi*, etiologic agent of Chagas disease. *Science* **309**, 409–415. (doi:10.1126/science.1112631)
3. Ivens, A. C. et al. 2005 The genome of the kinetoplastid parasite, *Leishmania major*. *Science* **309**, 436–442. (doi:10.1126/science.1112680)
4. Logan-Klumpler, F. J. et al. 2012 GeneDB—an annotation database for pathogens. *Nucl. Acids Res.* **40**, D98–D108. (doi:10.1093/nar/gkr1032)
5. Jackson, A. P. et al. 2015 Kinetoplastid Phylogenomics Reveals the Evolutionary Innovations Associated with the Origins of Parasitism. *Curr. Biol.* (doi:10.1016/j.cub.2015.11.055)
6. Pruitt, K. D., Tatusova, T. & Maglott, D. R. 2005 NCBI Reference Sequence (RefSeq): a curated non-redundant sequence database of genomes, transcripts and proteins. *Nucl. Acids Res.* **33**, D501–D504. (doi:10.1093/nar/gki025)
7. Benson, D. A., Karsch-Mizrachi, I., Lipman, D. J., Ostell, J. & Wheeler, D. L. 2005 GenBank. *Nucl. Acids Res.* **33**, D34–D38. (doi:10.1093/nar/gki063)
8. Akiyoshi, B. & Gull, K. 2014 Discovery of unconventional kinetochores in kinetoplastids. *Cell* **156**, 1247–1258. (doi:10.1016/j.cell.2014.01.049)
9. Poon, S. K., Peacock, L., Gibson, W., Gull, K. & Kelly, S. 2012 A modular and optimized single marker system for generating *Trypanosoma brucei* cell lines expressing T7 RNA polymerase and the tetracycline repressor. *Open Biol* **2**, 110037. (doi:10.1098/rsob.110037)
